# Supplementary material
Source: PubMed Central journal article supplement (PMC4247037)
Supplement: supp_mci222_mci222supplementaryfigures.pdf [file supp_mci222_mci222supplementaryfigures.pdf]

Intact coleoptiles

Excised coleoptiles

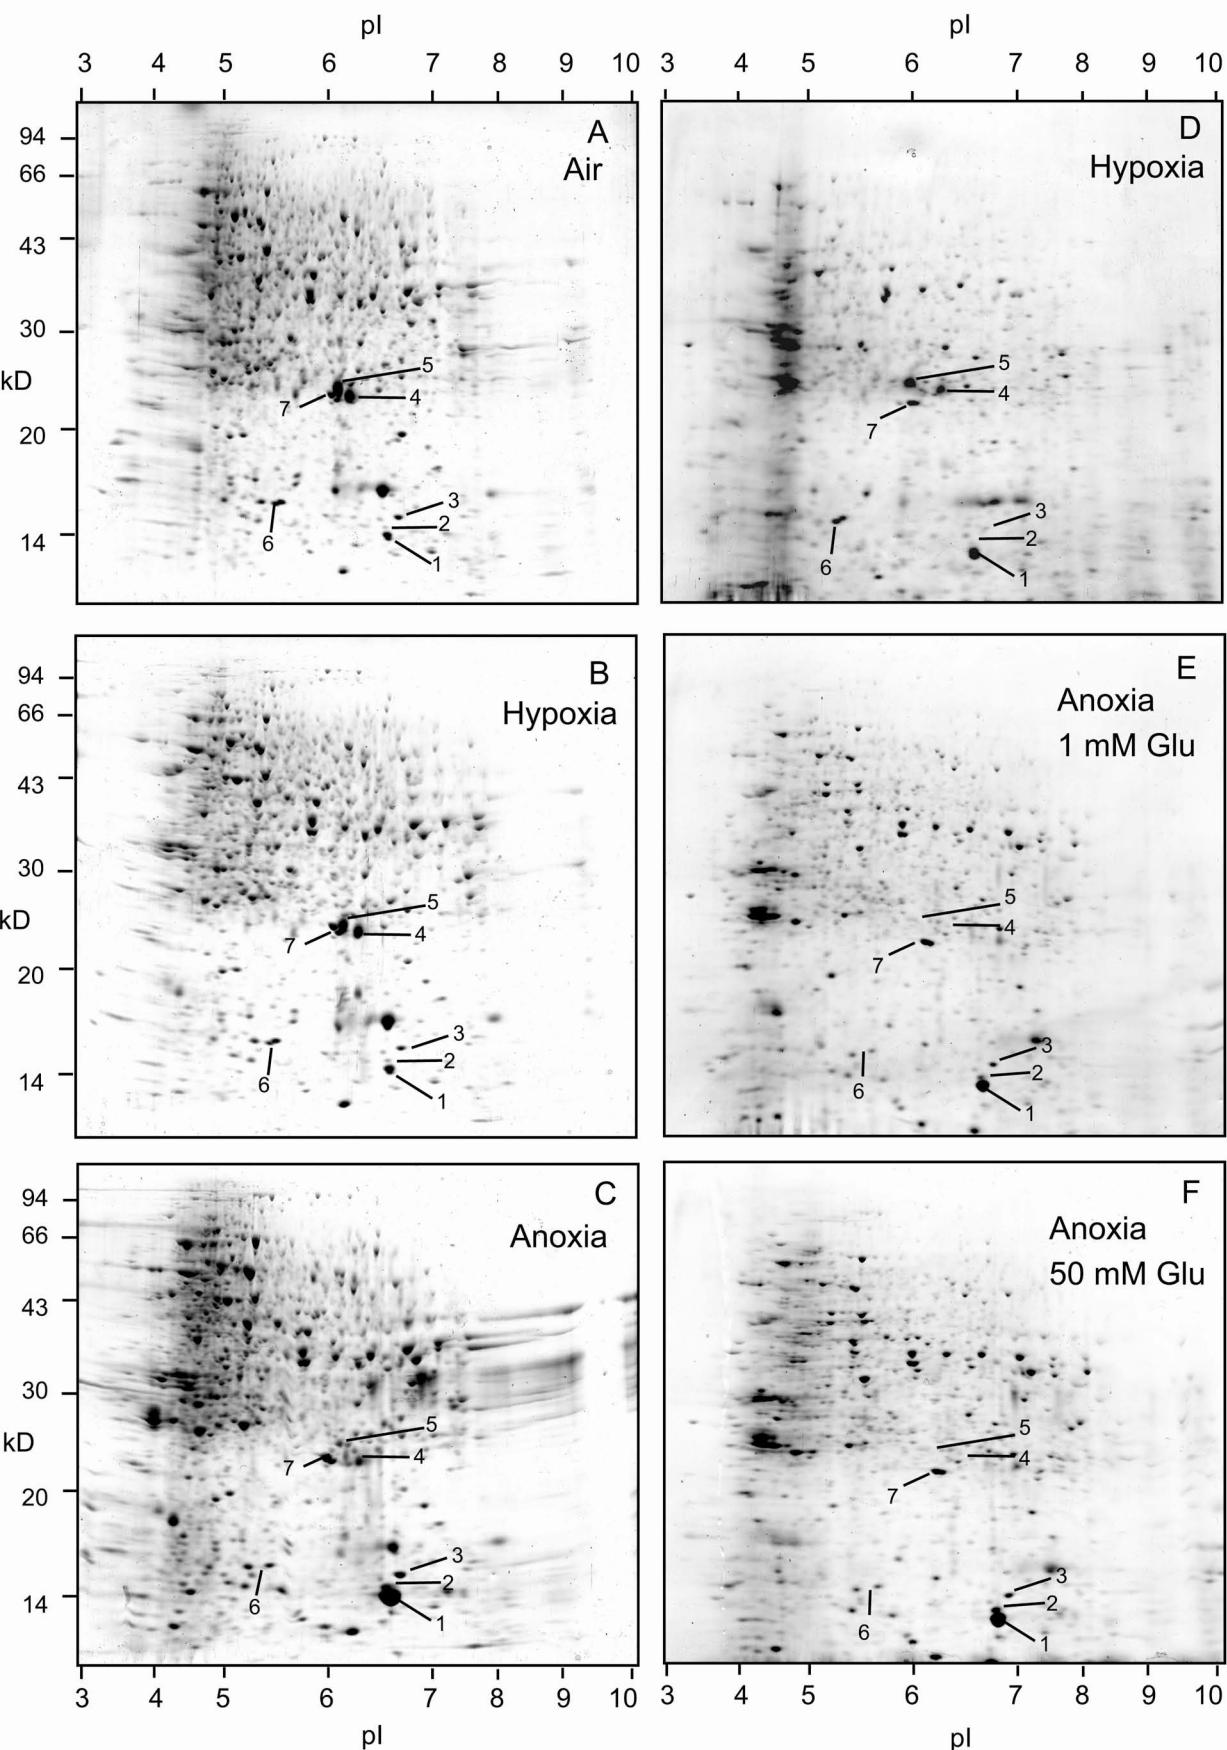

Supplementary Figure 1

Supplemental FIG. 1. Patterns of proteins in intact (A, B and C) and excised (D, E and F) rice coleoptile tips before and after 72<sup>h</sup> in anoxia. Data are Coomassie blue G-250-stained proteins (600<sup>μ</sup>g per gel) separated by two-dimensional IEF/SDS-PAGE. Tips excised from intact coleoptiles after: A, 72<sup>h</sup> in aeration after imbibition; B, 48<sup>h</sup> in aeration + 16<sup>h</sup> in hypoxia; C, 48<sup>h</sup> in aeration + 16<sup>h</sup> in hypoxia + 72<sup>h</sup> in anoxia. Excised coleoptile tips exposed to treatments; D, 48<sup>h</sup> in aeration + 16<sup>h</sup> in hypoxia + 5<sup>h</sup> in hypoxia (after excision); E, 48<sup>h</sup> in aeration + 16<sup>h</sup> in hypoxia + 5<sup>h</sup> in hypoxia (after excision) + 72<sup>h</sup> in anoxia (with 1<sup>mM</sup> glucose); F, 48<sup>h</sup> in aeration + 16<sup>h</sup> in hypoxia + 5<sup>h</sup> in hypoxia (after excision) + 72<sup>h</sup> in anoxia (with 50<sup>mM</sup> glucose).

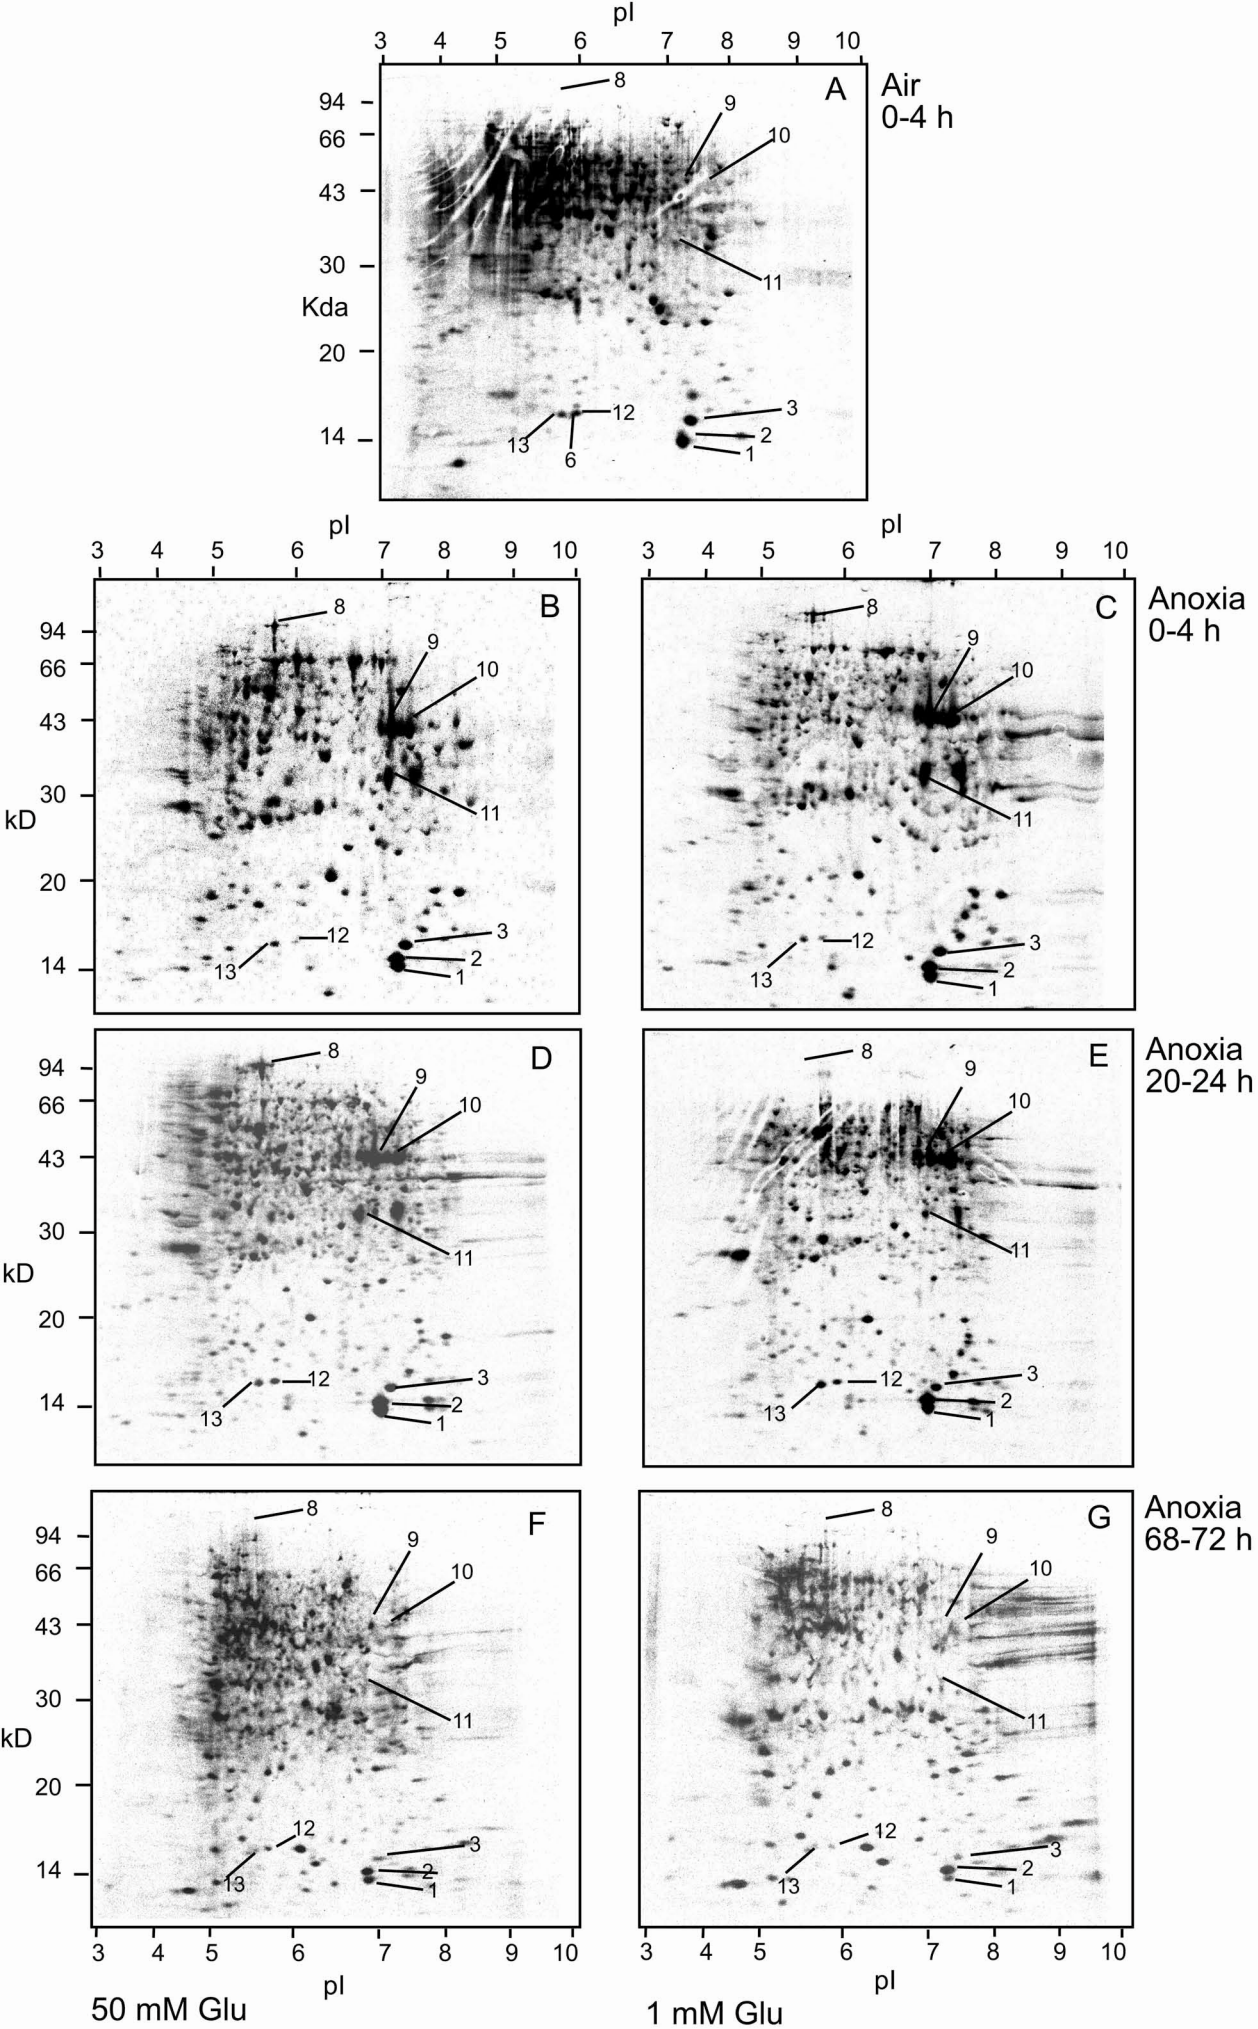

Supplementary Figure 2

Supplemental FIG. 2. Changes in pattern of *de novo* protein synthesis labelled with [<sup>35</sup>S]methionine in excised rice coleoptile tips in aeration or anoxia. Data are proteins (300<sup>μ</sup>g per gel) separated by two-dimensional IEF/SDS-PAGE and exposed for 3<sup>d</sup> to an image plate. Seedlings were germinated and grown for 48<sup>h</sup> in aerated solution (0.25<sup>mol m<sup>-3</sup> O<sub>2</sub></sup>), then pre-treated with 0.028<sup>mol m<sup>-3</sup> O<sub>2</sub></sup> for 16<sup>h</sup> prior to excision of the 7–11<sup>mm</sup> tips of coleoptiles. Excised coleoptiles were 'healed' for 5<sup>h</sup> in hypoxia (0.028<sup>mol m<sup>-3</sup> O<sub>2</sub></sup>) prior to treatments. A, 0–4<sup>h</sup> in aeration at 50<sup>mM</sup> glucose; B, 0–4<sup>h</sup> in anoxia at 50<sup>mM</sup> glucose; C, 0–4<sup>h</sup> in anoxia at 1<sup>mM</sup> glucose; D, 20–24 h in anoxia at 50<sup>mM</sup> glucose; E, 20–24<sup>h</sup> in anoxia at 1<sup>mM</sup> glucose; F, 68–72<sup>h</sup> in anoxia at 50<sup>mM</sup> glucose; G, 68–72<sup>h</sup> at 1<sup>mM</sup> glucose.
